# Supplementary material for: A theoretical study of thionine: spin—orbit coupling and intersystem crossing
Source: Royal Society of Chemistry journal article supplement (doi:10.1039/c2pp25224d), 2012-07-26
Supplement: c2pp25224d.pdf [file c2pp25224d.pdf]

# A theoretical study of thionine: Spin-orbit coupling and intersystem crossing

## Electronic Supporting Information

Angela Rodriguez-Serrano,<sup>a,b</sup> Vidisha Rai-Constapel,<sup>b</sup> Martha C. Daza,<sup>\*a</sup> Markus Doerr<sup>†a,c</sup>  
and Christel M. Marian<sup>‡b</sup>

<sup>a</sup>*Grupo de Bioquímica Teórica, Universidad Industrial de Santander, Carrera 27, Calle 9,  
Bucaramanga, Colombia.*

<sup>b</sup>*Institute of Theoretical and Computational Chemistry, Heinrich Heine University of  
Düsseldorf, Universitätsstr. 1, D-40225 Düsseldorf, Germany.*

<sup>c</sup>*Facultad de Química Ambiental, Universidad Santo Tomás, Carrera 18 No. 9-27,  
Bucaramanga, Colombia.*

---

\*Fax: +57 763 23778, Tel: +57 763 23778; E-mail: [mcdaza@uis.edu.co](mailto:mcdaza@uis.edu.co)

†Fax: +57 76712677, Tel: +57 76800801; E-mail: [markusdoerr@gmx.de](mailto:markusdoerr@gmx.de)

‡Fax: +49 (0)211 8113466, Tel: +49 (0)211 8113209; E-mail: [Christel.Marian@uni-duesseldorf.de](mailto:Christel.Marian@uni-duesseldorf.de)

**Table S1** Calculated rate constants  $k_{ISC}$  for the  $S_1 \rightarrow T_{1x}$  channel. Remaining columns: adiabatic energy difference  $\Delta E^{ad}$ , number of derivatives with respect of out-of-plane modes ( $\#_{derivs}$ ), width of the search interval  $\eta$ , number of accepting modes within the search interval ( $\#_{acc}$ ) and number of final state vibrational levels within the search interval ( $\#_v$ ).

| Channel                  | $\Delta E^{ad}/eV$ | vibr. SO<br>$\#_{derivs}$ | Acceptors<br>$\#_{acc}$ | Interval<br>$\eta/cm^{-1}$ | Levels<br>$\#_v$ | $k_{ISC}/s^{-1}$   |
|--------------------------|--------------------|---------------------------|-------------------------|----------------------------|------------------|--------------------|
| $S_1 \rightarrow T_{1x}$ | 0.64               | 12                        | 25                      | 0.001                      | $5 \times 10^2$  | $1.07 \times 10^0$ |
| $S_1 \rightarrow T_{1x}$ | 0.64               | 12                        | 25                      | 0.01                       | $6 \times 10^3$  | $4.43 \times 10^1$ |
| $S_1 \rightarrow T_{1x}$ | 0.64               | 12                        | 25                      | 0.1                        | $6 \times 10^4$  | $2.73 \times 10^3$ |
| $S_1 \rightarrow T_{1x}$ | 0.64               | 12                        | 25                      | 1                          | $6 \times 10^5$  | $1.96 \times 10^3$ |
| $S_1 \rightarrow T_{1x}$ | 0.64               | 12                        | 25                      | 10                         | $6 \times 10^6$  | $2.57 \times 10^3$ |
| $S_1 \rightarrow T_{1x}$ | 0.64               | 12                        | 25                      | 100                        | $6 \times 10^7$  | $3.28 \times 10^3$ |
| $S_1 \rightarrow T_{1x}$ | 0.64               | 12                        | 49                      | 0.001                      | $3 \times 10^4$  | $2.75 \times 10^3$ |
| $S_1 \rightarrow T_{1x}$ | 0.64               | 12                        | 49                      | 0.01                       | $3 \times 10^5$  | $3.36 \times 10^5$ |
| $S_1 \rightarrow T_{1x}$ | 0.64               | 12                        | 49                      | 0.1                        | $3 \times 10^6$  | $2.40 \times 10^5$ |
| $S_1 \rightarrow T_{1x}$ | 0.64               | 12                        | 49                      | 1                          | $3 \times 10^7$  | $3.63 \times 10^5$ |
| $S_1 \rightarrow T_{1x}$ | 0.64               | 12                        | 49                      | 10                         | $1 \times 10^8$  | $7.51 \times 10^5$ |

**Table S2** Calculated rate constants  $k_{ISC}$  for the  $S_1 \rightarrow T_{1z}$  channel. Remaining columns: adiabatic energy difference  $\Delta E^{ad}$ , number of derivatives with respect of out-of-plane modes ( $\#_{derivs}$ ), width of the search interval  $\eta$ , number of accepting modes within the search interval ( $\#_{acc}$ ) and number of final state vibrational levels within the search interval ( $\#_v$ ).

| Channel                  | $\Delta E^{ad}/eV$ | vibr. SO<br>$\#_{derivs}$ | Acceptors<br>$\#_{acc}$ | Interval<br>$\eta/cm^{-1}$ | Levels<br>$\#_v$ | $k_{ISC}/s^{-1}$   |
|--------------------------|--------------------|---------------------------|-------------------------|----------------------------|------------------|--------------------|
| $S_1 \rightarrow T_{1z}$ | 0.64               | 11                        | 25                      | 0.001                      | $4 \times 10^2$  | $1.66 \times 10^1$ |
| $S_1 \rightarrow T_{1z}$ | 0.64               | 11                        | 25                      | 0.01                       | $4 \times 10^3$  | $1.27 \times 10^2$ |
| $S_1 \rightarrow T_{1z}$ | 0.64               | 11                        | 25                      | 0.1                        | $4 \times 10^4$  | $3.62 \times 10^3$ |
| $S_1 \rightarrow T_{1z}$ | 0.64               | 11                        | 25                      | 1                          | $4 \times 10^5$  | $5.10 \times 10^3$ |
| $S_1 \rightarrow T_{1z}$ | 0.64               | 11                        | 25                      | 10                         | $4 \times 10^6$  | $3.96 \times 10^3$ |
| $S_1 \rightarrow T_{1z}$ | 0.64               | 11                        | 25                      | 100                        | $4 \times 10^7$  | $4.31 \times 10^3$ |
| $S_1 \rightarrow T_{1z}$ | 0.64               | 11                        | 49                      | 0.001                      | $2 \times 10^4$  | $4.51 \times 10^4$ |
| $S_1 \rightarrow T_{1z}$ | 0.64               | 11                        | 49                      | 0.01                       | $2 \times 10^5$  | $1.98 \times 10^5$ |
| $S_1 \rightarrow T_{1z}$ | 0.64               | 11                        | 49                      | 0.1                        | $2 \times 10^6$  | $2.14 \times 10^5$ |
| $S_1 \rightarrow T_{1z}$ | 0.64               | 11                        | 49                      | 1                          | $2 \times 10^7$  | $4.15 \times 10^6$ |
| $S_1 \rightarrow T_{1z}$ | 0.64               | 11                        | 49                      | 10                         | $1 \times 10^7$  | $1.56 \times 10^5$ |

**Table S3** Calculated rate constants  $k_{ISC}$  for the  $S_1 \rightarrow T_{2x}$  channel. Remaining columns: adiabatic energy difference  $\Delta E^{ad}$ , number of derivatives with respect of out-of-plane modes ( $\#_{derivs}$ ), width of the search interval  $\eta$ , number of accepting modes within the search interval ( $\#_{acc}$ ) and number of final state vibrational levels within the search interval ( $\#_v$ ).

| Channel                  | $\Delta E^{ad}/eV$ | vibr. SO<br>$\#_{derivs}$ | Acceptors<br>$\#_{acc}$ | Interval<br>$\eta/cm^{-1}$ | Levels<br>$\#_v$ | $k_{ISC}/s^{-1}$   |
|--------------------------|--------------------|---------------------------|-------------------------|----------------------------|------------------|--------------------|
| $S_1 \rightarrow T_{2x}$ | 0.30               | 11                        | 25                      | 0.001                      | 6                | $2.27 \times 10^6$ |
| $S_1 \rightarrow T_{2x}$ | 0.30               | 11                        | 25                      | 0.01                       | 33               | $1.50 \times 10^8$ |
| $S_1 \rightarrow T_{2x}$ | 0.30               | 11                        | 25                      | 0.1                        | $3 \times 10^2$  | $9.73 \times 10^7$ |
| $S_1 \rightarrow T_{2x}$ | 0.30               | 11                        | 25                      | 1                          | $3 \times 10^3$  | $1.03 \times 10^8$ |
| $S_1 \rightarrow T_{2x}$ | 0.30               | 11                        | 25                      | 10                         | $3 \times 10^4$  | $1.28 \times 10^8$ |
| $S_1 \rightarrow T_{2x}$ | 0.30               | 11                        | 25                      | 100                        | $3 \times 10^5$  | $1.40 \times 10^8$ |
| $S_1 \rightarrow T_{2x}$ | 0.30               | 11                        | 49                      | 0.001                      | 42               | $4.86 \times 10^7$ |
| $S_1 \rightarrow T_{2x}$ | 0.30               | 11                        | 49                      | 0.01                       | $5 \times 10^2$  | $1.96 \times 10^8$ |
| $S_1 \rightarrow T_{2x}$ | 0.30               | 11                        | 49                      | 0.1                        | $5 \times 10^3$  | $1.55 \times 10^8$ |
| $S_1 \rightarrow T_{2x}$ | 0.30               | 11                        | 49                      | 1                          | $5 \times 10^4$  | $2.81 \times 10^8$ |
| $S_1 \rightarrow T_{2x}$ | 0.30               | 11                        | 49                      | 10                         | $5 \times 10^5$  | $2.79 \times 10^8$ |
| $S_1 \rightarrow T_{2x}$ | 0.30               | 11                        | 49                      | 100                        | $5 \times 10^6$  | $2.94 \times 10^8$ |
| $S_1 \rightarrow T_{2x}$ | 0.30               | 11                        | 72                      | 0.001                      | $9 \times 10^3$  | $5.16 \times 10^7$ |
| $S_1 \rightarrow T_{2x}$ | 0.30               | 11                        | 72                      | 0.01                       | $9 \times 10^4$  | $2.06 \times 10^8$ |
| $S_1 \rightarrow T_{2x}$ | 0.30               | 11                        | 72                      | 0.1                        | $9 \times 10^5$  | $1.89 \times 10^8$ |
| $S_1 \rightarrow T_{2x}$ | 0.30               | 11                        | 72                      | 1                          | $9 \times 10^6$  | $3.13 \times 10^8$ |
| $S_1 \rightarrow T_{2x}$ | 0.30               | 11                        | 72                      | 10                         | $2 \times 10^7$  | $3.07 \times 10^8$ |
| $S_1 \rightarrow T_{2x}$ | 0.30               | 11                        | 72                      | 100                        | $2 \times 10^8$  | $3.23 \times 10^8$ |
| $S_1 \rightarrow T_{2x}$ | 0.30               | 1 ( $v_1$ )               | 25                      | 0.001                      | 6                | $4.69 \times 10^5$ |
| $S_1 \rightarrow T_{2x}$ | 0.30               | 1 ( $v_1$ )               | 25                      | 0.01                       | 33               | $3.51 \times 10^7$ |
| $S_1 \rightarrow T_{2x}$ | 0.30               | 1 ( $v_1$ )               | 25                      | 0.1                        | $3 \times 10^2$  | $9.52 \times 10^7$ |
| $S_1 \rightarrow T_{2x}$ | 0.30               | 1 ( $v_1$ )               | 25                      | 1                          | $3 \times 10^3$  | $3.11 \times 10^7$ |
| $S_1 \rightarrow T_{2x}$ | 0.30               | 1 ( $v_1$ )               | 25                      | 10                         | $3 \times 10^4$  | $4.00 \times 10^7$ |
| $S_1 \rightarrow T_{2x}$ | 0.30               | 1 ( $v_1$ )               | 25                      | 100                        | $3 \times 10^5$  | $5.10 \times 10^7$ |
| $S_1 \rightarrow T_{2x}$ | 0.30               | 1 ( $v_1$ )               | 49                      | 0.001                      | 42               | $1.46 \times 10^7$ |
| $S_1 \rightarrow T_{2x}$ | 0.30               | 1 ( $v_1$ )               | 49                      | 0.01                       | $5 \times 10^2$  | $1.24 \times 10^8$ |
| $S_1 \rightarrow T_{2x}$ | 0.30               | 1 ( $v_1$ )               | 49                      | 0.1                        | $5 \times 10^3$  | $1.28 \times 10^8$ |
| $S_1 \rightarrow T_{2x}$ | 0.30               | 1 ( $v_1$ )               | 49                      | 1                          | $5 \times 10^4$  | $1.44 \times 10^8$ |
| $S_1 \rightarrow T_{2x}$ | 0.30               | 1 ( $v_1$ )               | 49                      | 10                         | $5 \times 10^5$  | $1.04 \times 10^8$ |
| $S_1 \rightarrow T_{2x}$ | 0.30               | 1 ( $v_1$ )               | 49                      | 100                        | $5 \times 10^6$  | $1.12 \times 10^8$ |
| $S_1 \rightarrow T_{2x}$ | 0.30               | 1 ( $v_1$ )               | 72                      | 0.001                      | $9 \times 10^3$  | $1.59 \times 10^7$ |
| $S_1 \rightarrow T_{2x}$ | 0.30               | 1 ( $v_1$ )               | 72                      | 0.01                       | $9 \times 10^4$  | $1.30 \times 10^8$ |
| $S_1 \rightarrow T_{2x}$ | 0.30               | 1 ( $v_1$ )               | 72                      | 0.1                        | $9 \times 10^5$  | $1.43 \times 10^8$ |
| $S_1 \rightarrow T_{2x}$ | 0.30               | 6                         | 25                      | 0.001                      | 6                | $2.30 \times 10^6$ |
| $S_1 \rightarrow T_{2x}$ | 0.30               | 6                         | 25                      | 0.01                       | 33               | $1.53 \times 10^8$ |
| $S_1 \rightarrow T_{2x}$ | 0.30               | 6                         | 25                      | 0.1                        | $3 \times 10^2$  | $1.07 \times 10^8$ |
| $S_1 \rightarrow T_{2x}$ | 0.30               | 6                         | 25                      | 1                          | $3 \times 10^3$  | $9.81 \times 10^7$ |
| $S_1 \rightarrow T_{2x}$ | 0.30               | 6                         | 25                      | 10                         | $3 \times 10^4$  | $1.26 \times 10^8$ |
| $S_1 \rightarrow T_{2x}$ | 0.30               | 6                         | 25                      | 100                        | $3 \times 10^5$  | $1.26 \times 10^8$ |
| $S_1 \rightarrow T_{2x}$ | 0.30               | 6                         | 49                      | 0.001                      | 42               | $4.72 \times 10^7$ |
| $S_1 \rightarrow T_{2x}$ | 0.30               | 6                         | 49                      | 0.01                       | $5 \times 10^2$  | $1.88 \times 10^8$ |
| $S_1 \rightarrow T_{2x}$ | 0.30               | 6                         | 49                      | 0.1                        | $5 \times 10^3$  | $1.62 \times 10^8$ |
| $S_1 \rightarrow T_{2x}$ | 0.30               | 6                         | 49                      | 1                          | $5 \times 10^4$  | $2.76 \times 10^8$ |
| $S_1 \rightarrow T_{2x}$ | 0.30               | 6                         | 49                      | 10                         | $5 \times 10^5$  | $2.72 \times 10^8$ |
| $S_1 \rightarrow T_{2x}$ | 0.30               | 6                         | 49                      | 100                        | $5 \times 10^6$  | $2.73 \times 10^8$ |

**Table S4** Calculated rate constants  $k_{ISC}$  for the  $S_1 \rightarrow T_{2z}$  channel. Remaining columns: adiabatic energy difference  $\Delta E^{ad}$ , number of derivatives with respect of out-of-plane modes ( $\#_{derivs}$ ), width of the search interval  $\eta$ , number of accepting modes within the search interval ( $\#_{acc}$ ) and number of final state vibrational levels within the search interval ( $\#_v$ ).

| Channel                  | $\Delta E^{ad}/eV$ | vibr. SO<br>$\#_{derivs}$ | Acceptors<br>$\#_{acc}$ | Interval<br>$\eta/cm^{-1}$ | Levels<br>$\#_v$ | $k_{ISC}/s^{-1}$   |
|--------------------------|--------------------|---------------------------|-------------------------|----------------------------|------------------|--------------------|
| $S_1 \rightarrow T_{2z}$ | 0.30               | 12                        | 25                      | 0.001                      | 3                | $2.87 \times 10^2$ |
| $S_1 \rightarrow T_{2z}$ | 0.30               | 12                        | 25                      | 0.01                       | 33               | $2.49 \times 10^7$ |
| $S_1 \rightarrow T_{2z}$ | 0.30               | 12                        | 25                      | 0.1                        | $4 \times 10^2$  | $1.93 \times 10^7$ |
| $S_1 \rightarrow T_{2z}$ | 0.30               | 12                        | 25                      | 1                          | $4 \times 10^3$  | $7.70 \times 10^7$ |
| $S_1 \rightarrow T_{2z}$ | 0.30               | 12                        | 25                      | 10                         | $4 \times 10^4$  | $6.34 \times 10^7$ |
| $S_1 \rightarrow T_{2z}$ | 0.30               | 12                        | 25                      | 100                        | $4 \times 10^5$  | $2.93 \times 10^7$ |
| $S_1 \rightarrow T_{2z}$ | 0.30               | 12                        | 49                      | 0.001                      | 28               | $2.14 \times 10^3$ |
| $S_1 \rightarrow T_{2z}$ | 0.30               | 12                        | 49                      | 0.01                       | $3 \times 10^2$  | $2.67 \times 10^7$ |
| $S_1 \rightarrow T_{2z}$ | 0.30               | 12                        | 49                      | 0.1                        | $4 \times 10^3$  | $6.30 \times 10^7$ |
| $S_1 \rightarrow T_{2z}$ | 0.30               | 12                        | 49                      | 1                          | $4 \times 10^4$  | $9.16 \times 10^7$ |
| $S_1 \rightarrow T_{2z}$ | 0.30               | 12                        | 49                      | 10                         | $4 \times 10^5$  | $1.60 \times 10^8$ |
| $S_1 \rightarrow T_{2z}$ | 0.30               | 12                        | 49                      | 100                        | $4 \times 10^6$  | $1.98 \times 10^8$ |
| $S_1 \rightarrow T_{2z}$ | 0.30               | 12                        | 72                      | 0.001                      | $5 \times 10^3$  | $7.32 \times 10^6$ |
| $S_1 \rightarrow T_{2z}$ | 0.30               | 12                        | 72                      | 0.01                       | $5 \times 10^4$  | $8.81 \times 10^7$ |
| $S_1 \rightarrow T_{2z}$ | 0.30               | 12                        | 72                      | 0.1                        | $1 \times 10^5$  | $1.39 \times 10^8$ |
| $S_1 \rightarrow T_{2z}$ | 0.30               | 12                        | 72                      | 1                          | $1 \times 10^6$  | $1.39 \times 10^8$ |
| $S_1 \rightarrow T_{2z}$ | 0.30               | 12                        | 72                      | 10                         | $5 \times 10^7$  | $2.33 \times 10^8$ |
| $S_1 \rightarrow T_{2z}$ | 0.30               | 1 ( $\nu_8$ )             | 25                      | 0.001                      | 3                | $1.39 \times 10^3$ |
| $S_1 \rightarrow T_{2z}$ | 0.30               | 1 ( $\nu_8$ )             | 25                      | 0.01                       | 33               | $2.69 \times 10^7$ |
| $S_1 \rightarrow T_{2z}$ | 0.30               | 1 ( $\nu_8$ )             | 25                      | 0.1                        | $4 \times 10^2$  | $3.65 \times 10^6$ |
| $S_1 \rightarrow T_{2z}$ | 0.30               | 1 ( $\nu_8$ )             | 25                      | 1                          | $4 \times 10^3$  | $1.15 \times 10^7$ |
| $S_1 \rightarrow T_{2z}$ | 0.30               | 1 ( $\nu_8$ )             | 25                      | 10                         | $4 \times 10^4$  | $2.97 \times 10^7$ |
| $S_1 \rightarrow T_{2z}$ | 0.30               | 1 ( $\nu_8$ )             | 25                      | 100                        | $4 \times 10^5$  | $3.70 \times 10^7$ |
| $S_1 \rightarrow T_{2z}$ | 0.30               | 1 ( $\nu_8$ )             | 49                      | 0.001                      | 28               | $1.54 \times 10^3$ |
| $S_1 \rightarrow T_{2z}$ | 0.30               | 1 ( $\nu_8$ )             | 49                      | 0.01                       | $3 \times 10^2$  | $2.74 \times 10^7$ |
| $S_1 \rightarrow T_{2z}$ | 0.30               | 1 ( $\nu_8$ )             | 49                      | 0.1                        | $4 \times 10^3$  | $1.48 \times 10^7$ |
| $S_1 \rightarrow T_{2z}$ | 0.30               | 1 ( $\nu_8$ )             | 49                      | 1                          | $4 \times 10^4$  | $3.60 \times 10^7$ |
| $S_1 \rightarrow T_{2z}$ | 0.30               | 1 ( $\nu_8$ )             | 49                      | 10                         | $4 \times 10^5$  | $8.66 \times 10^7$ |
| $S_1 \rightarrow T_{2z}$ | 0.30               | 1 ( $\nu_8$ )             | 49                      | 100                        | $4 \times 10^6$  | $1.20 \times 10^8$ |
| $S_1 \rightarrow T_{2z}$ | 0.30               | 1 ( $\nu_{20}$ )          | 25                      | 0.001                      | 3                | $6.63 \times 10^1$ |
| $S_1 \rightarrow T_{2z}$ | 0.30               | 1 ( $\nu_{20}$ )          | 25                      | 0.01                       | 33               | $1.42 \times 10^3$ |
| $S_1 \rightarrow T_{2z}$ | 0.30               | 1 ( $\nu_{20}$ )          | 25                      | 0.1                        | $4 \times 10^2$  | $3.13 \times 10^5$ |
| $S_1 \rightarrow T_{2z}$ | 0.30               | 1 ( $\nu_{20}$ )          | 25                      | 1                          | $4 \times 10^3$  | $6.33 \times 10^6$ |
| $S_1 \rightarrow T_{2z}$ | 0.30               | 1 ( $\nu_{20}$ )          | 25                      | 10                         | $4 \times 10^4$  | $1.05 \times 10^7$ |
| $S_1 \rightarrow T_{2z}$ | 0.30               | 1 ( $\nu_{20}$ )          | 25                      | 100                        | $4 \times 10^5$  | $1.25 \times 10^7$ |
| $S_1 \rightarrow T_{2z}$ | 0.30               | 1 ( $\nu_{20}$ )          | 49                      | 0.001                      | 28               | $1.62 \times 10^2$ |
| $S_1 \rightarrow T_{2z}$ | 0.30               | 1 ( $\nu_{20}$ )          | 49                      | 0.01                       | $3 \times 10^2$  | $9.59 \times 10^4$ |
| $S_1 \rightarrow T_{2z}$ | 0.30               | 1 ( $\nu_{20}$ )          | 49                      | 0.1                        | $4 \times 10^3$  | $1.67 \times 10^6$ |
| $S_1 \rightarrow T_{2z}$ | 0.30               | 1 ( $\nu_{20}$ )          | 49                      | 1                          | $4 \times 10^4$  | $3.71 \times 10^7$ |
| $S_1 \rightarrow T_{2z}$ | 0.30               | 1 ( $\nu_{20}$ )          | 49                      | 10                         | $4 \times 10^5$  | $4.00 \times 10^7$ |
| $S_1 \rightarrow T_{2z}$ | 0.30               | 1 ( $\nu_{20}$ )          | 49                      | 100                        | $4 \times 10^6$  | $2.99 \times 10^7$ |

**Table S5** Harmonic frequencies  $\nu_i$  of the  $A''$  out-of-plane vibrational modes for the  $S_2$  ( $\pi_{H,1} \rightarrow \pi_{L}^*$ ) state. Derivatives of the SOMEs with respect to the corresponding (dimensionless) normal coordinates at the  $S_2$  ( $\pi_{H,1} \rightarrow \pi_{L}^*$ ) DFT/MRCI minimum.

| Modes | $\bar{\nu}_i / \text{cm}^{-1}$ | $\frac{\partial \langle S_2   \hat{H}_{SO}   T_{1x} \rangle}{\partial q_i}$ | $\frac{\partial \langle S_2   \hat{H}_{SO}   T_{1y} \rangle}{\partial q_i}$ | $\frac{\partial \langle S_2   \hat{H}_{SO}   T_{2x} \rangle}{\partial q_i}$ | $\frac{\partial \langle S_2   \hat{H}_{SO}   T_{2y} \rangle}{\partial q_i}$ |
|-------|--------------------------------|-----------------------------------------------------------------------------|-----------------------------------------------------------------------------|-----------------------------------------------------------------------------|-----------------------------------------------------------------------------|
| 1     | 20.0                           | -0.18                                                                       | 1.31                                                                        | 1.97                                                                        | -0.62                                                                       |
| 2     | 43.5                           | 0.03                                                                        | -0.21                                                                       | -0.19                                                                       | 0.12                                                                        |
| 3     | 78.8                           | 0.52                                                                        | -0.02                                                                       | -0.44                                                                       | 0.06                                                                        |
| 4     | 153.1                          | 0.20                                                                        | -0.18                                                                       | -0.37                                                                       | 0.11                                                                        |
| 6     | 170.1                          | -0.08                                                                       | 0.31                                                                        | 0.05                                                                        | 0.05                                                                        |
| 7     | 181.9                          | -0.05                                                                       | -0.03                                                                       | -0.02                                                                       | -0.08                                                                       |
| 9     | 250.5                          | -0.16                                                                       | -0.05                                                                       | 0.10                                                                        | 0.04                                                                        |
| 10    | 269.5                          | 0.31                                                                        | 0.09                                                                        | -0.37                                                                       | -0.15                                                                       |
| 11    | 291.5                          | 0.09                                                                        | 1.10                                                                        | -0.17                                                                       | -0.82                                                                       |
| 13    | 317.6                          | 0.39                                                                        | 0.27                                                                        | -0.44                                                                       | -0.33                                                                       |
| 15    | 386.5                          | 0.41                                                                        | 0.64                                                                        | -0.37                                                                       | -0.36                                                                       |
| 17    | 398.5                          | 0.48                                                                        | -0.28                                                                       | -0.60                                                                       | 0.20                                                                        |
| 18    | 429.1                          | -0.61                                                                       | -0.60                                                                       | 0.63                                                                        | 0.67                                                                        |
| 20    | 433.8                          | -0.32                                                                       | 0.65                                                                        | 0.17                                                                        | -0.56                                                                       |
| 23    | 534.6                          | -0.06                                                                       | 0.11                                                                        | -0.18                                                                       | -0.33                                                                       |
| 24    | 545.6                          | -0.20                                                                       | 0.01                                                                        | 0.08                                                                        | -0.01                                                                       |
| 25    | 555.1                          | 0.18                                                                        | 0.34                                                                        | 0.00                                                                        | -0.40                                                                       |
| 29    | 747.7                          | -0.37                                                                       | -0.72                                                                       | 0.48                                                                        | 0.32                                                                        |
| 30    | 788.9                          | 0.43                                                                        | -0.46                                                                       | -0.28                                                                       | 0.26                                                                        |
| 32    | 831.5                          | 0.41                                                                        | 0.06                                                                        | -0.45                                                                       | -0.10                                                                       |
| 33    | 836.3                          | 0.12                                                                        | 0.47                                                                        | -0.26                                                                       | -0.39                                                                       |
| 37    | 924.4                          | -0.29                                                                       | -0.10                                                                       | 0.39                                                                        | 0.10                                                                        |
| 38    | 928.1                          | -0.01                                                                       | 0.16                                                                        | -0.22                                                                       | -0.04                                                                       |

**Table S6** Calculated rate constants  $k_{ISC}$  for the  $S_2 \rightarrow T_{i(x/y)}$  ( $i = 1, 2$ ) channels. Remaining columns: adiabatic energy difference  $\Delta E^{ad}$ , number of derivatives with respect of out-of-plane modes ( $\#_{deriv}$ ), width of the search interval  $\eta$ , number of accepting modes within the search interval ( $\#_{acc}$ ) and number of final state vibrational levels within the search interval ( $\#_{\nu}$ ).

| Channel                  | $\Delta E^{ad}/\text{eV}$ | vibr. SO<br>$\#_{deriv}$ | Acceptors<br>$\#_{acc}$ | Interval<br>$\eta/\text{cm}^{-1}$ | Levels<br>$\#_{\nu}$ | $k_{ISC}/\text{s}^{-1}$ |
|--------------------------|---------------------------|--------------------------|-------------------------|-----------------------------------|----------------------|-------------------------|
| $S_2 \rightarrow T_{1x}$ | 0.66                      | 23                       | 49                      | 0.001                             | $2 \times 10^2$      | $2.10 \times 10^4$      |
| $S_2 \rightarrow T_{1x}$ | 0.66                      | 23                       | 49                      | 0.01                              | $2 \times 10^3$      | $6.53 \times 10^5$      |
| $S_2 \rightarrow T_{1x}$ | 0.66                      | 23                       | 49                      | 0.1                               | $2 \times 10^4$      | $5.71 \times 10^6$      |
| $S_2 \rightarrow T_{1x}$ | 0.66                      | 23                       | 49                      | 1                                 | $2 \times 10^5$      | $5.56 \times 10^6$      |
| $S_2 \rightarrow T_{1x}$ | 0.66                      | 23                       | 49                      | 10                                | $2 \times 10^6$      | $3.17 \times 10^6$      |
| $S_2 \rightarrow T_{1x}$ | 0.66                      | 23                       | 49                      | 100                               | -                    | -                       |
| $S_2 \rightarrow T_{1y}$ | 0.66                      | 23                       | 49                      | 0.001                             | $2 \times 10^2$      | $4.53 \times 10^4$      |
| $S_2 \rightarrow T_{1y}$ | 0.66                      | 23                       | 49                      | 0.01                              | $2 \times 10^3$      | $1.64 \times 10^6$      |
| $S_2 \rightarrow T_{1y}$ | 0.66                      | 23                       | 49                      | 0.1                               | $2 \times 10^4$      | $4.02 \times 10^6$      |
| $S_2 \rightarrow T_{1y}$ | 0.66                      | 23                       | 49                      | 1                                 | $2 \times 10^5$      | $8.63 \times 10^6$      |
| $S_2 \rightarrow T_{1y}$ | 0.66                      | 23                       | 49                      | 10                                | $2 \times 10^6$      | $5.67 \times 10^6$      |
| $S_2 \rightarrow T_{1y}$ | 0.66                      | 23                       | 49                      | 100                               | -                    | -                       |
| $S_2 \rightarrow T_{2x}$ | 0.66                      | 23                       | 49                      | 0.001                             | 0                    | -                       |
| $S_2 \rightarrow T_{2x}$ | 0.32                      | 23                       | 49                      | 0.01                              | 3                    | $3.91 \times 10^1$      |
| $S_2 \rightarrow T_{2x}$ | 0.32                      | 23                       | 49                      | 0.1                               | 41                   | $5.14 \times 10^5$      |
| $S_2 \rightarrow T_{2x}$ | 0.32                      | 23                       | 49                      | 1                                 | $4 \times 10^2$      | $7.40 \times 10^6$      |
| $S_2 \rightarrow T_{2x}$ | 0.32                      | 23                       | 49                      | 10                                | $5 \times 10^3$      | $3.22 \times 10^6$      |
| $S_2 \rightarrow T_{2x}$ | 0.32                      | 23                       | 49                      | 100                               | $5 \times 10^4$      | $2.62 \times 10^6$      |
| $S_2 \rightarrow T_{2y}$ | 0.32                      | 23                       | 49                      | 0.001                             | 0                    | -                       |
| $S_2 \rightarrow T_{2y}$ | 0.32                      | 23                       | 49                      | 0.01                              | 3                    | $1.63 \times 10^3$      |
| $S_2 \rightarrow T_{2y}$ | 0.32                      | 23                       | 49                      | 0.1                               | 41                   | $9.43 \times 10^4$      |
| $S_2 \rightarrow T_{2y}$ | 0.32                      | 23                       | 49                      | 1                                 | $4 \times 10^2$      | $2.68 \times 10^5$      |
| $S_2 \rightarrow T_{2y}$ | 0.32                      | 23                       | 49                      | 10                                | $5 \times 10^3$      | $4.03 \times 10^6$      |
| $S_2 \rightarrow T_{2y}$ | 0.32                      | 23                       | 49                      | 100                               | $5 \times 10^4$      | $3.58 \times 10^6$      |

**Table S7** Calculated rate constants  $k_{ISC}$  for the  $S_1 \rightarrow T_{i(x/z)}$  ( $i = 1, 2$ ) channel varying the adiabatic energy difference  $\Delta E^{ad}$ . Remaining columns: number of derivatives with respect of out-of-plane modes ( $\#_{derivs}$ ), width of the search interval  $\eta$ , number of accepting modes within the search interval ( $\#_{acc}$ ) and number of final state vibrational levels within the search interval ( $\#_v$ ).

| Channel                  | $\Delta E^{ad}/eV$ | vibr. SO<br>$\#_{derivs}$ | Acceptors<br>$\#_{acc}$ | Interval<br>$\eta/cm^{-1}$ | Levels<br>$\#_v$ | $k_{ISC}/s^{-1}$   |
|--------------------------|--------------------|---------------------------|-------------------------|----------------------------|------------------|--------------------|
| $S_1 \rightarrow T_{1x}$ | 0.68               | 12                        | 49                      | 0.001                      | $7 \times 10^4$  | $1.34 \times 10^4$ |
| $S_1 \rightarrow T_{1x}$ | 0.68               | 12                        | 49                      | 0.01                       | $7 \times 10^5$  | $2.05 \times 10^4$ |
| $S_1 \rightarrow T_{1x}$ | 0.68               | 12                        | 49                      | 0.1                        | $7 \times 10^6$  | $3.06 \times 10^5$ |
| $S_1 \rightarrow T_{1x}$ | 0.68               | 12                        | 49                      | 1                          | $7 \times 10^7$  | $2.44 \times 10^5$ |
| $S_1 \rightarrow T_{1z}$ | 0.68               | 11                        | 49                      | 0.001                      | $5 \times 10^4$  | $2.04 \times 10^4$ |
| $S_1 \rightarrow T_{1z}$ | 0.68               | 11                        | 49                      | 0.01                       | $5 \times 10^5$  | $2.54 \times 10^5$ |
| $S_1 \rightarrow T_{1z}$ | 0.68               | 11                        | 49                      | 0.1                        | $5 \times 10^6$  | $1.27 \times 10^6$ |
| $S_1 \rightarrow T_{1z}$ | 0.68               | 11                        | 49                      | 1                          | $5 \times 10^7$  | $4.00 \times 10^5$ |
| $S_1 \rightarrow T_{2x}$ | 0.19               | 11                        | 49                      | 0.001                      | 4                | $3.60 \times 10^3$ |
| $S_1 \rightarrow T_{2x}$ | 0.19               | 11                        | 49                      | 0.01                       | 41               | $2.08 \times 10^8$ |
| $S_1 \rightarrow T_{2x}$ | 0.19               | 11                        | 49                      | 0.1                        | $5 \times 10^2$  | $7.79 \times 10^7$ |
| $S_1 \rightarrow T_{2x}$ | 0.19               | 11                        | 49                      | 1                          | $5 \times 10^3$  | $1.31 \times 10^9$ |
| $S_1 \rightarrow T_{2x}$ | 0.21               | 11                        | 49                      | 0.001                      | 3                | $8.41 \times 10^4$ |
| $S_1 \rightarrow T_{2x}$ | 0.21               | 11                        | 49                      | 0.01                       | 78               | $3.49 \times 10^7$ |
| $S_1 \rightarrow T_{2x}$ | 0.21               | 11                        | 49                      | 0.1                        | $8 \times 10^2$  | $1.29 \times 10^9$ |
| $S_1 \rightarrow T_{2x}$ | 0.21               | 11                        | 49                      | 1                          | $8 \times 10^3$  | $6.21 \times 10^8$ |
| $S_1 \rightarrow T_{2x}$ | 0.22               | 11                        | 49                      | 0.01                       | $1 \times 10^2$  | $6.22 \times 10^8$ |
| $S_1 \rightarrow T_{2x}$ | 0.22               | 11                        | 49                      | 0.1                        | $1 \times 10^3$  | $2.12 \times 10^8$ |
| $S_1 \rightarrow T_{2x}$ | 0.22               | 11                        | 49                      | 1                          | $1 \times 10^4$  | $1.98 \times 10^8$ |
| $S_1 \rightarrow T_{2x}$ | 0.31               | 11                        | 49                      | 0.001                      | 90               | $9.33 \times 10^6$ |
| $S_1 \rightarrow T_{2x}$ | 0.31               | 11                        | 49                      | 0.01                       | $9 \times 10^2$  | $1.94 \times 10^7$ |
| $S_1 \rightarrow T_{2x}$ | 0.31               | 11                        | 49                      | 0.1                        | $9 \times 10^3$  | $7.72 \times 10^7$ |
| $S_1 \rightarrow T_{2x}$ | 0.31               | 11                        | 49                      | 1                          | $9 \times 10^4$  | $3.04 \times 10^8$ |
| $S_1 \rightarrow T_{2z}$ | 0.19               | 12                        | 49                      | 0.001                      | 6                | $2.69 \times 10^3$ |
| $S_1 \rightarrow T_{2z}$ | 0.19               | 12                        | 49                      | 0.01                       | 41               | $3.36 \times 10^6$ |
| $S_1 \rightarrow T_{2z}$ | 0.19               | 12                        | 49                      | 0.1                        | $4 \times 10^2$  | $1.08 \times 10^7$ |
| $S_1 \rightarrow T_{2z}$ | 0.19               | 12                        | 49                      | 1                          | $4 \times 10^3$  | $4.69 \times 10^7$ |
| $S_1 \rightarrow T_{2z}$ | 0.21               | 12                        | 49                      | 0.001                      | 5                | $9.88 \times 10^3$ |
| $S_1 \rightarrow T_{2z}$ | 0.21               | 12                        | 49                      | 0.01                       | 75               | $2.46 \times 10^5$ |
| $S_1 \rightarrow T_{2z}$ | 0.21               | 12                        | 49                      | 0.1                        | $6 \times 10^2$  | $3.72 \times 10^6$ |
| $S_1 \rightarrow T_{2z}$ | 0.21               | 12                        | 49                      | 1                          | $6 \times 10^3$  | $9.39 \times 10^7$ |
| $S_1 \rightarrow T_{2z}$ | 0.22               | 12                        | 49                      | 0.001                      | 13               | $4.34 \times 10^1$ |
| $S_1 \rightarrow T_{2z}$ | 0.22               | 12                        | 49                      | 0.01                       | 91               | $5.47 \times 10^6$ |
| $S_1 \rightarrow T_{2z}$ | 0.22               | 12                        | 49                      | 0.1                        | $9 \times 10^2$  | $1.42 \times 10^7$ |
| $S_1 \rightarrow T_{2z}$ | 0.22               | 12                        | 49                      | 1                          | $9 \times 10^3$  | $5.24 \times 10^8$ |
| $S_1 \rightarrow T_{2z}$ | 0.31               | 12                        | 49                      | 0.001                      | 80               | $2.00 \times 10^5$ |
| $S_1 \rightarrow T_{2z}$ | 0.31               | 12                        | 49                      | 0.01                       | $7 \times 10^2$  | $4.49 \times 10^7$ |
| $S_1 \rightarrow T_{2z}$ | 0.31               | 12                        | 49                      | 0.1                        | $7 \times 10^3$  | $1.50 \times 10^8$ |
| $S_1 \rightarrow T_{2z}$ | 0.31               | 12                        | 49                      | 1                          | $7 \times 10^4$  | $6.96 \times 10^7$ |
